# Supplementary material for: Serum microRNA-4297 is a sex-specific predictive biomarker of glioma grade and prognosis
Source: PubMed Central journal article supplement (PMC9363699; doi:10.3389/fneur.2022.888221), 2022-07-27

## Supplementary Materials

**Table S1** Primer sequences in this study

| Primer name  | Sequence (5'-3')                                       |
|--------------|--------------------------------------------------------|
| MiR-4297 RT  | GTCGTATCCAGTGCAGGGTCCGAGGTATTCGCACTGGATACGACACG<br>GAA |
| MiR-4297 For | CGCGCGGTGTCTGTCC                                       |
| MiR-4297 Rev | AGTGCAGGGTCCGAGGTATT                                   |
| U6 RT        | AACGCTTCACGAATTTGCGT                                   |
| U6 For       | CTCGCTTCGGCAGCACA                                      |
| U6 Rev       | AACGCTTCACGAATTTGCGT                                   |

*RT* reverse transcription, *For* forward, *Res* reverse

**Table S2** Selected characteristics of cases and controls for rs7896488 genotype analysis

| Characteristics  | Cases (n=138) | Controls (n=327) | <i>p</i> value     |
|------------------|---------------|------------------|--------------------|
| Age, mean (SD)   | 44.4 (15.8)   | 48.4 (12.5)      | 0.095 <sup>a</sup> |
| Sex, n (%)       |               |                  | 0.887 <sup>b</sup> |
| Male             | 90 (65.2)     | 211 (64.5)       |                    |
| Female           | 48 (34.8)     | 116 (35.5)       |                    |
| WHO grade, n (%) |               |                  |                    |
| I                | 7 (5.1)       |                  |                    |
| II               | 45 (32.6)     |                  |                    |
| III              | 29 (21.0)     |                  |                    |
| IV               | 43 (31.2)     |                  |                    |
| Unknown          | 14 (10.1)     |                  |                    |

<sup>a</sup> Wilcoxon rank sum test for comparison between two groups

<sup>b</sup> Two-sided  $\chi^2$  test for comparison between two groups

**Table S3** Genotype frequencies of rs7896488 in patients and controls and its association with risk of glioma

| Genotype                              | Patients<br>(N = 138) | Controls<br>(N = 327) | OR <sup>a</sup> (95% CI) | <i>p</i> value |
|---------------------------------------|-----------------------|-----------------------|--------------------------|----------------|
| GG                                    | 79 (57.25)            | 219 (67.80)           | 1.000 (reference)        |                |
| AG                                    | 53 (38.40)            | 94 (29.10)            | 1.563 (1.023-2.388)      | 0.039          |
| AA                                    | 6 (4.35)              | 10 (3.10)             | 1.663 (0.585-4.726)      | 0.340          |
| AG+AA                                 | 59 (42.75)            | 104 (32.20)           | 1.533 (1.044-2.370)      | 0.030          |
| <i>P<sub>trend</sub></i> <sup>b</sup> |                       |                       |                          | 0.036          |

<sup>a</sup> ORs were calculated by logistic regression, adjusted for age and sex

<sup>b</sup> Tests for trend of odds were based on likelihood ratio tests assuming a multiplicative model

**Supplementary FIGURE S1** miR-4297 directly targets MGMT3'UTR and upregulates MGMT expression

Human 293 T cells were transfected with luciferase reporter constructs containing pGL3-miR4297-3'-UTR-WT, pGL3-miR4297-UTR-MT, and pGL3-miR4297 NC, respectively. Experiments were conducted three times respectively and data were expressed as the mean  $\pm$  SEM.

(A) miR-4297 directly targets MGMT3'UTR. The light blue highlight shows the binding site sequence. The red character represents MGMT gene rs7896488 (G>A), a polymorphism at the miR-4297 binding site; (B) miR-4297 probably promotes the luciferase activity of the wild-type MGMT 3'UTR-WT reporter gene vector containing the rs7896488 wild allele (G allele)

*WT* wild type, *MT* mutant type

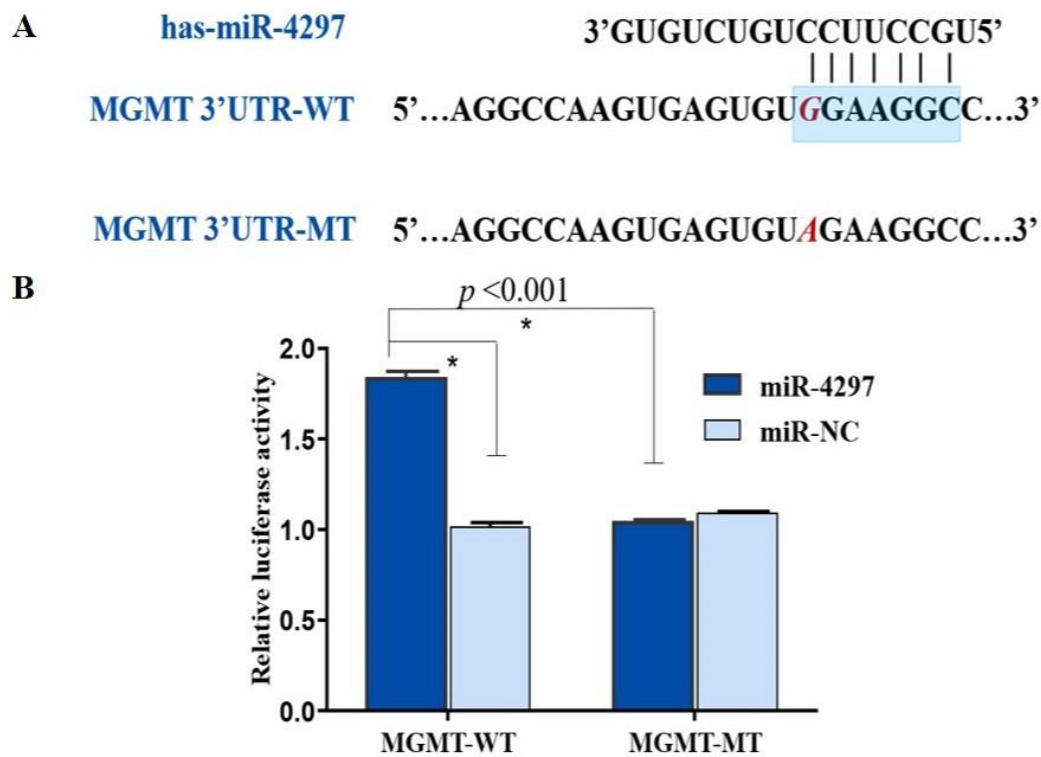

Supplementary FIGURE S2 Kaplan-Meier estimates of the PFS of glioma patients according to the binding site in *MGMT* 3'UTR rs7896488 genotypes. PFS progression-free survival

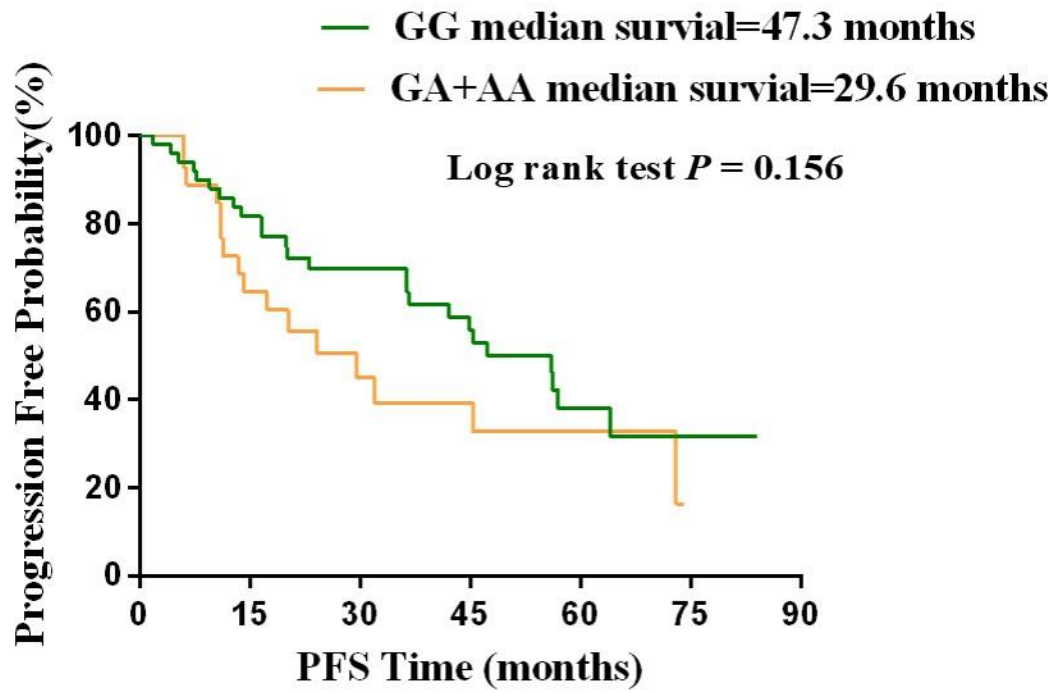

Supplement: Data_Sheet_1.pdf [file Data_Sheet_1.pdf]
